# Supplementary material for: Parks are Critical Urban Infrastructure: Perception and Use of Urban Green Spaces in NYC During COVID-19
Source: Preprints.org preprint supplement (doi:10.20944/preprints202008.0620.v2), 2020-09-30
Supplement: Supplementary file 1 [file supplementary]

**Table 1.** Regression coefficients for logit regressions predicting the selection of concerns about visiting urban green spaces.

| Response                                    | Predictor      | Comparison                | LogRatio | P-value  |
|---------------------------------------------|----------------|---------------------------|----------|----------|
| People are not practicing social distancing |                | (Intercept)               | 1.73     | 0.048 *  |
| People are not practicing social distancing | Gender         | Male : Female             | 0.864    | 0.334    |
| People are not practicing social distancing | Gender         | Nonbinary : Female        | 1.494    | 0.455    |
| People are not practicing social distancing | Race/ethnicity | Asian : not Asian         | 1.646    | 0.128    |
| People are not practicing social distancing | Race/ethnicity | Black : not Black         | 0.964    | 0.903    |
| People are not practicing social distancing | Race/ethnicity | Latinx : not Latinx       | 1.212    | 0.422    |
| People are not practicing social distancing | Race/ethnicity | White : not White         | 0.98     | 0.939    |
| People are not practicing social distancing | Borough        | Bronx : Manhattan         | 0.711    | 0.26     |
| People are not practicing social distancing | Borough        | Queens : Manhattan        | 0.986    | 0.947    |
| People are not practicing social distancing | Borough        | Brooklyn : Manhattan      | 1.044    | 0.77     |
| People are not practicing social distancing | Borough        | Staten Island : Manhattan | 0.471    | 0.226    |
| Too crowded                                 |                | (Intercept)               | 1.61     | 0.085    |
| Too crowded                                 | Gender         | Male : Female             | 0.809    | 0.162    |
| Too crowded                                 | Gender         | Nonbinary : Female        | 1.664    | 0.354    |
| Too crowded                                 | Race/ethnicity | Asian : not Asian         | 1.273    | 0.449    |
| Too crowded                                 | Race/ethnicity | Black : not Black         | 0.664    | 0.178    |
| Too crowded                                 | Race/ethnicity | Latinx : not Latinx       | 1.233    | 0.382    |
| Too crowded                                 | Race/ethnicity | White : not White         | 0.925    | 0.762    |
| Too crowded                                 | Borough        | Bronx : Manhattan         | 0.428    | 0.006 ** |
| Too crowded                                 | Borough        | Queens : Manhattan        | 0.951    | 0.81     |
| Too crowded                                 | Borough        | Brooklyn : Manhattan      | 1.458    | 0.011 *  |
| Too crowded                                 | Borough        | Staten Island : Manhattan | 0.247    | 0.043 *  |
| It does not feel safe                       |                | (Intercept)               | 0.238    | 0 ***    |
| It does not feel safe                       | Gender         | Male : Female             | 1.021    | 0.923    |
| It does not feel safe                       | Gender         | Nonbinary : Female        | 0.343    | 0.306    |
| It does not feel safe                       | Race/ethnicity | Asian : not Asian         | 1.631    | 0.193    |
| It does not feel safe                       | Race/ethnicity | Black : not Black         | 0.988    | 0.975    |
| It does not feel safe                       | Race/ethnicity | Latinx : not Latinx       | 1.448    | 0.203    |
| It does not feel safe                       | Race/ethnicity | White : not White         | 0.669    | 0.213    |
| It does not feel safe                       | Borough        | Bronx : Manhattan         | 1.08     | 0.845    |
| It does not feel safe                       | Borough        | Queens : Manhattan        | 0.867    | 0.621    |
| It does not feel safe                       | Borough        | Brooklyn : Manhattan      | 0.74     | 0.144    |
| It does not feel safe                       | Borough        | Staten Island : Manhattan | 0        | 0.975    |
| Not being maintained / kept clean           |                | (Intercept)               | 0.151    | 0 ***    |
| Not being maintained / kept clean           | Gender         | Male : Female             | 0.891    | 0.61     |
| Not being maintained / kept clean           | Gender         | Nonbinary : Female        | 0.74     | 0.694    |
| Not being maintained / kept clean           | Race/ethnicity | Asian : not Asian         | 0.891    | 0.793    |
| Not being maintained / kept clean           | Race/ethnicity | Black : not Black         | 1.5      | 0.297    |
| Not being maintained / kept clean           | Race/ethnicity | Latinx : not Latinx       | 1.19     | 0.578    |

|                                   |                |                           |       |          |
|-----------------------------------|----------------|---------------------------|-------|----------|
| Not being maintained / kept clean | Race/ethnicity | White : not White         | 0.748 | 0.399    |
| Not being maintained / kept clean | Borough        | Bronx : Manhattan         | 1.623 | 0.221    |
| Not being maintained / kept clean | Borough        | Queens : Manhattan        | 1.096 | 0.775    |
| Not being maintained / kept clean | Borough        | Brooklyn : Manhattan      | 1.267 | 0.285    |
| Not being maintained / kept clean | Borough        | Staten Island : Manhattan | 2.108 | 0.355    |
| Too much police presence          |                | (Intercept)               | 0.118 | 0 ***    |
| Too much police presence          | Gender         | Male : Female             | 1.013 | 0.953    |
| Too much police presence          | Gender         | Nonbinary : Female        | 7.097 | 0 ***    |
| Too much police presence          | Race/ethnicity | Asian : not Asian         | 0.998 | 0.997    |
| Too much police presence          | Race/ethnicity | Black : not Black         | 2.049 | 0.075    |
| Too much police presence          | Race/ethnicity | Latinx : not Latinx       | 1.071 | 0.837    |
| Too much police presence          | Race/ethnicity | White : not White         | 1.015 | 0.968    |
| Too much police presence          | Borough        | Bronx : Manhattan         | 0.509 | 0.199    |
| Too much police presence          | Borough        | Queens : Manhattan        | 0.599 | 0.169    |
| Too much police presence          | Borough        | Brooklyn : Manhattan      | 1.472 | 0.066    |
| Too much police presence          | Borough        | Staten Island : Manhattan | 0     | 0.974    |
| Not enough park staff             |                | (Intercept)               | 0.106 | 0 ***    |
| Not enough park staff             | Gender         | Male : Female             | 1.262 | 0.296    |
| Not enough park staff             | Gender         | Nonbinary : Female        | 0.988 | 0.988    |
| Not enough park staff             | Race/ethnicity | Asian : not Asian         | 0.832 | 0.705    |
| Not enough park staff             | Race/ethnicity | Black : not Black         | 0.859 | 0.724    |
| Not enough park staff             | Race/ethnicity | Latinx : not Latinx       | 2.066 | 0.014 *  |
| Not enough park staff             | Race/ethnicity | White : not White         | 1.105 | 0.786    |
| Not enough park staff             | Borough        | Bronx : Manhattan         | 2.394 | 0.02 *   |
| Not enough park staff             | Borough        | Queens : Manhattan        | 0.939 | 0.846    |
| Not enough park staff             | Borough        | Brooklyn : Manhattan      | 0.848 | 0.474    |
| Not enough park staff             | Borough        | Staten Island : Manhattan | 1.799 | 0.466    |
| I do not have easy access         |                | (Intercept)               | 0.048 | 0 ***    |
| I do not have easy access         | Gender         | Male : Female             | 0.924 | 0.769    |
| I do not have easy access         | Gender         | Nonbinary : Female        | 1.238 | 0.787    |
| I do not have easy access         | Race/ethnicity | Asian : not Asian         | 1.42  | 0.485    |
| I do not have easy access         | Race/ethnicity | Black : not Black         | 2.345 | 0.08     |
| I do not have easy access         | Race/ethnicity | Latinx : not Latinx       | 0.55  | 0.19     |
| I do not have easy access         | Race/ethnicity | White : not White         | 0.847 | 0.702    |
| I do not have easy access         | Borough        | Bronx : Manhattan         | 1.316 | 0.653    |
| I do not have easy access         | Borough        | Queens : Manhattan        | 4.904 | 0 ***    |
| I do not have easy access         | Borough        | Brooklyn : Manhattan      | 2.44  | 0.004 ** |
| I do not have easy access         | Borough        | Staten Island : Manhattan | 0     | 0.985    |
| Use of chemicals to control weeds |                | (Intercept)               | 0.103 | 0 ***    |
| Use of chemicals to control weeds | Gender         | Male : Female             | 0.714 | 0.352    |
| Use of chemicals to control weeds | Gender         | Nonbinary : Female        | 1.896 | 0.417    |
| Use of chemicals to control weeds | Race/ethnicity | Asian : not Asian         | 1.342 | 0.594    |
| Use of chemicals to control weeds | Race/ethnicity | Black : not Black         | 0.591 | 0.425    |

|                                              |                |                           |       |          |
|----------------------------------------------|----------------|---------------------------|-------|----------|
| Use of chemicals to control weeds            | Race/ethnicity | Latinx : not Latinx       | 1.025 | 0.962    |
| Use of chemicals to control weeds            | Race/ethnicity | White : not White         | 0.566 | 0.245    |
| Use of chemicals to control weeds            | Borough        | Bronx : Manhattan         | 0.61  | 0.533    |
| Use of chemicals to control weeds            | Borough        | Queens : Manhattan        | 1.106 | 0.81     |
| Use of chemicals to control weeds            | Borough        | Brooklyn : Manhattan      | 0.747 | 0.365    |
| Use of chemicals to control weeds            | Borough        | Staten Island : Manhattan | 3.739 | 0.112    |
| Not enough lighting                          |                | (Intercept)               | 0.095 | 0 ***    |
| Not enough lighting                          | Gender         | Male : Female             | 0.949 | 0.889    |
| Not enough lighting                          | Gender         | Nonbinary : Female        | 4.206 | 0.037 *  |
| Not enough lighting                          | Race/ethnicity | Asian : not Asian         | 0.377 | 0.249    |
| Not enough lighting                          | Race/ethnicity | Black : not Black         | 1.392 | 0.566    |
| Not enough lighting                          | Race/ethnicity | Latinx : not Latinx       | 0.579 | 0.351    |
| Not enough lighting                          | Race/ethnicity | White : not White         | 0.526 | 0.227    |
| Not enough lighting                          | Borough        | Bronx : Manhattan         | 1.657 | 0.353    |
| Not enough lighting                          | Borough        | Queens : Manhattan        | 0.729 | 0.544    |
| Not enough lighting                          | Borough        | Brooklyn : Manhattan      | 0.539 | 0.092    |
| Not enough lighting                          | Borough        | Staten Island : Manhattan | 1.722 | 0.624    |
| Not child-friendly                           |                | (Intercept)               | 0.004 | 0 ***    |
| Not child-friendly                           | Gender         | Male : Female             | 1.478 | 0.348    |
| Not child-friendly                           | Gender         | Nonbinary : Female        | 0     | 0.992    |
| Not child-friendly                           | Race/ethnicity | Asian : not Asian         | 1.122 | 0.917    |
| Not child-friendly                           | Race/ethnicity | Black : not Black         | 0.578 | 0.64     |
| Not child-friendly                           | Race/ethnicity | Latinx : not Latinx       | 4.033 | 0.006 ** |
| Not child-friendly                           | Race/ethnicity | White : not White         | 7.508 | 0.078    |
| Not child-friendly                           | Borough        | Bronx : Manhattan         | 1.223 | 0.807    |
| Not child-friendly                           | Borough        | Queens : Manhattan        | 0.576 | 0.406    |
| Not child-friendly                           | Borough        | Brooklyn : Manhattan      | 0.653 | 0.319    |
| Not child-friendly                           | Borough        | Staten Island : Manhattan | 0     | 0.994    |
| Not open during the times I would like to go |                | (Intercept)               | 0.03  | 0 ***    |
| Not open during the times I would like to go | Gender         | Male : Female             | 1.029 | 0.956    |
| Not open during the times I would like to go | Gender         | Nonbinary : Female        | 3.156 | 0.287    |
| Not open during the times I would like to go | Race/ethnicity | Asian : not Asian         | 1.286 | 0.775    |
| Not open during the times I would like to go | Race/ethnicity | Black : not Black         | 0.351 | 0.381    |
| Not open during the times I would like to go | Race/ethnicity | Latinx : not Latinx       | 1.019 | 0.981    |
| Not open during the times I would like to go | Race/ethnicity | White : not White         | 0.627 | 0.545    |
| Not open during the times I would like to go | Borough        | Bronx : Manhattan         | 1.02  | 0.986    |
| Not open during the times I would like to go | Borough        | Queens : Manhattan        | 1.432 | 0.575    |
| Not open during the times I would like to go | Borough        | Brooklyn : Manhattan      | 0.924 | 0.877    |
| Not open during the times I would like to go | Borough        | Staten Island : Manhattan | 0     | 0.991    |
| Does not meet my needs                       |                | (Intercept)               | 0.008 | 0 ***    |
| Does not meet my needs                       | Gender         | Male : Female             | 3.594 | 0.01 *   |
| Does not meet my needs                       | Gender         | Nonbinary : Female        | 4.69  | 0.166    |
| Does not meet my needs                       | Race/ethnicity | Asian : not Asian         | 1.39  | 0.757    |

|                        |                |                           |       |       |
|------------------------|----------------|---------------------------|-------|-------|
| Does not meet my needs | Race/ethnicity | Black : not Black         | 1.328 | 0.8   |
| Does not meet my needs | Race/ethnicity | Latinx : not Latinx       | 0.556 | 0.581 |
| Does not meet my needs | Race/ethnicity | White : not White         | 0.868 | 0.883 |
| Does not meet my needs | Borough        | Bronx : Manhattan         | 1.426 | 0.765 |
| Does not meet my needs | Borough        | Queens : Manhattan        | 2.038 | 0.36  |
| Does not meet my needs | Borough        | Brooklyn : Manhattan      | 1.685 | 0.391 |
| Does not meet my needs | Borough        | Staten Island : Manhattan | 7.63  | 0.09  |

**Table 2.** Regression coefficients for logit regressions predicting the whether respondents perceive that they have access to different types of urban green space (parks, natural areas, beaches, or NYCHA open spaces).

| Response         | Predictor      | Comparison                | LogRatio | P-value  |
|------------------|----------------|---------------------------|----------|----------|
| Public park      |                | (Intercept)               | 2.609    | 0.002 ** |
| Public park      | Gender         | Male : Female             | 0.844    | 0.328    |
| Public park      | Gender         | Nonbinary : Female        | 1.025    | 0.966    |
| Public park      | Race/ethnicity | Asian : not Asian         | 1.221    | 0.563    |
| Public park      | Race/ethnicity | Black : not Black         | 0.97     | 0.926    |
| Public park      | Race/ethnicity | Latinx : not Latinx       | 1.081    | 0.77     |
| Public park      | Race/ethnicity | White : not White         | 2.215    | 0.004 ** |
| Public park      | Borough        | Bronx : Manhattan         | 0.926    | 0.834    |
| Public park      | Borough        | Queens : Manhattan        | 0.357    | 0 ***    |
| Public park      | Borough        | Brooklyn : Manhattan      | 0.674    | 0.027 *  |
| Public park      | Borough        | Staten Island : Manhattan | 2.131    | 0.472    |
| Natural area     |                | (Intercept)               | 0.267    | 0 ***    |
| Natural area     | Gender         | Male : Female             | 1.165    | 0.367    |
| Natural area     | Gender         | Nonbinary : Female        | 1.298    | 0.637    |
| Natural area     | Race/ethnicity | Asian : not Asian         | 0.733    | 0.4      |
| Natural area     | Race/ethnicity | Black : not Black         | 0.792    | 0.499    |
| Natural area     | Race/ethnicity | Latinx : not Latinx       | 0.996    | 0.988    |
| Natural area     | Race/ethnicity | White : not White         | 1.078    | 0.796    |
| Natural area     | Borough        | Bronx : Manhattan         | 3.663    | 0 ***    |
| Natural area     | Borough        | Queens : Manhattan        | 1.785    | 0.009 ** |
| Natural area     | Borough        | Brooklyn : Manhattan      | 0.847    | 0.333    |
| Natural area     | Borough        | Staten Island : Manhattan | 3.932    | 0.017 *  |
| Beach            |                | (Intercept)               | 0.035    | 0 ***    |
| Beach            | Gender         | Male : Female             | 0.91     | 0.685    |
| Beach            | Gender         | Nonbinary : Female        | 1.645    | 0.419    |
| Beach            | Race/ethnicity | Asian : not Asian         | 0.318    | 0.052    |
| Beach            | Race/ethnicity | Black : not Black         | 1.14     | 0.748    |
| Beach            | Race/ethnicity | Latinx : not Latinx       | 1.878    | 0.035 *  |
| Beach            | Race/ethnicity | White : not White         | 0.812    | 0.562    |
| Beach            | Borough        | Bronx : Manhattan         | 8.301    | 0 ***    |
| Beach            | Borough        | Queens : Manhattan        | 5.816    | 0 ***    |
| Beach            | Borough        | Brooklyn : Manhattan      | 7.19     | 0 ***    |
| Beach            | Borough        | Staten Island : Manhattan | 23.479   | 0 ***    |
| NYCHA open space |                | (Intercept)               | 0.007    | 0 ***    |
| NYCHA open space | Gender         | Male : Female             | 1.269    | 0.691    |
| NYCHA open space | Gender         | Nonbinary : Female        | 0        | 0.992    |
| NYCHA open space | Race/ethnicity | Asian : not Asian         | 1.734    | 0.653    |
| NYCHA open space | Race/ethnicity | Black : not Black         | 5.043    | 0.106    |

|                  |                |                           |       |       |
|------------------|----------------|---------------------------|-------|-------|
| NYCHA open space | Race/ethnicity | Latinx : not Latinx       | 1.302 | 0.748 |
| NYCHA open space | Race/ethnicity | White : not White         | 2.169 | 0.431 |
| NYCHA open space | Borough        | Bronx : Manhattan         | 0.58  | 0.64  |
| NYCHA open space | Borough        | Queens : Manhattan        | 0.899 | 0.898 |
| NYCHA open space | Borough        | Brooklyn : Manhattan      | 0.621 | 0.437 |
| NYCHA open space | Borough        | Staten Island : Manhattan | 0     | 0.994 |

**Table 3.** Regression coefficients for ordinal regressions predicting responses relating to urban green space visitation during the Covid-19 pandemic and the perceived importance of urban green spaces for health.

| Response                                      | Predictor      | Comparison                | LogRatio | Lower bound (2.5%) | Upper bound (97.5%) |
|-----------------------------------------------|----------------|---------------------------|----------|--------------------|---------------------|
| Travel time to most visited urban green space | Gender         | Male : Female             | 0.843    | 0.637              | 1.114               |
| Travel time to most visited urban green space | Gender         | Nonbinary : Female        | 0.839    | 0.328              | 2.073               |
| Travel time to most visited urban green space | Race/ethnicity | Asian : not Asian         | 1.017    | 0.587              | 1.757               |
| Travel time to most visited urban green space | Race/ethnicity | Black : not Black         | 1.45     | 0.826              | 2.554               |
| Travel time to most visited urban green space | Race/ethnicity | Latinx : not Latinx       | 1.439    | 0.928              | 2.225               |
| Travel time to most visited urban green space | Race/ethnicity | White : not White         | 0.742    | 0.473              | 1.166               |
| Travel time to most visited urban green space | Borough        | Bronx : Manhattan         | 1.018    | 0.58               | 1.773               |
| Travel time to most visited urban green space | Borough        | Queens : Manhattan        | 3.13     | 2.044              | 4.8 *               |
| Travel time to most visited urban green space | Borough        | Brooklyn : Manhattan      | 2.526    | 1.93               | 3.314 *             |
| Travel time to most visited urban green space | Borough        | Staten Island : Manhattan | 0.929    | 0.299              | 2.659               |
| Urban green space visit frequency             | Gender         | Male : Female             | 1.152    | 0.878              | 1.512               |
| Urban green space visit frequency             | Gender         | Nonbinary : Female        | 1.885    | 0.747              | 4.837               |
| Urban green space visit frequency             | Race/ethnicity | Asian : not Asian         | 0.757    | 0.429              | 1.333               |
| Urban green space visit frequency             | Race/ethnicity | Black : not Black         | 0.708    | 0.4                | 1.252               |
| Urban green space visit frequency             | Race/ethnicity | Latinx : not Latinx       | 0.622    | 0.408              | 0.948 *             |
| Urban green space visit frequency             | Race/ethnicity | White : not White         | 1.663    | 1.05               | 2.637 *             |
| Urban green space visit frequency             | Borough        | Bronx : Manhattan         | 0.989    | 0.555              | 1.764               |
| Urban green space visit frequency             | Borough        | Queens : Manhattan        | 0.595    | 0.399              | 0.886 *             |
| Urban green space visit frequency             | Borough        | Brooklyn : Manhattan      | 0.78     | 0.602              | 1.011               |
| Urban green space visit frequency             | Borough        | Staten Island : Manhattan | 0.506    | 0.183              | 1.371               |

|                                                    |                 |                           |       |       |         |
|----------------------------------------------------|-----------------|---------------------------|-------|-------|---------|
| Change in urban green space visits since Covid-19  | Gender          | Male : Female             | 0.737 | 0.475 | 1.141   |
| Change in urban green space visits since Covid-19  | Gender          | Nonbinary : Female        | 3.605 | 0.665 | 26.352  |
| Change in urban green space visits since Covid-19  | Race/ethnicity  | Asian : not Asian         | 2.487 | 0.984 | 6.569   |
| Change in urban green space visits since Covid-19  | Race/ethnicity  | Black : not Black         | 1.267 | 0.475 | 3.433   |
| Change in urban green space visits since Covid-19  | Race/ethnicity  | Latinx : not Latinx       | 0.685 | 0.326 | 1.437   |
| Change in urban green space visits since Covid-19  | Race/ethnicity  | White : not White         | 2.039 | 0.974 | 4.342   |
| Change in urban green space visits since Covid-19  | Borough         | Bronx : Manhattan         | 0.898 | 0.36  | 2.262   |
| Change in urban green space visits since Covid-19  | Borough         | Queens : Manhattan        | 0.742 | 0.355 | 1.557   |
| Change in urban green space visits since Covid-19  | Borough         | Brooklyn : Manhattan      | 0.692 | 0.434 | 1.098   |
| Change in urban green space visits since Covid-19  | Borough         | Staten Island : Manhattan | 0.942 | 0.092 | 17.598  |
| Change in urban green space visits since Covid-19  | Concern: "Peo   | Selected : not Selected   | 0.505 | 0.325 | 0.78 *  |
| Change in urban green space visits since Covid-19  | Concern: "Too   | Selected : not Selected   | 0.821 | 0.52  | 1.296   |
| Change in urban green space visits since Covid-19  | Concern: I do r | Selected : not Selected   | 0.305 | 0.136 | 0.668 * |
| Change in urban green space visits since Covid-19  | Concern: "It dc | Selected : not Selected   | 0.336 | 0.164 | 0.671 * |
| Change in urban green space visits since Covid-19  | Concern: "Not   | Selected : not Selected   | 1.727 | 0.984 | 3.083   |
| Importance of urban green spaces for mental health | Gender          | Male : Female             | 0.509 | 0.38  | 0.684 * |



|                                                      |                |                           |       |       |         |
|------------------------------------------------------|----------------|---------------------------|-------|-------|---------|
| Importance of urban green spaces for mental health   | Gender         | Nonbinary : Female        | 1.198 | 0.441 | 3.85    |
| Importance of urban green spaces for mental health   | Race/ethnicity | Asian : not Asian         | 0.634 | 0.347 | 1.171   |
| Importance of urban green spaces for mental health   | Race/ethnicity | Black : not Black         | 0.424 | 0.234 | 0.766 * |
| Importance of urban green spaces for mental health   | Race/ethnicity | Latinx : not Latinx       | 1.422 | 0.877 | 2.374   |
| Importance of urban green spaces for mental health   | Race/ethnicity | White : not White         | 1.17  | 0.697 | 1.942   |
| Importance of urban green spaces for mental health   | Borough        | Bronx : Manhattan         | 1.207 | 0.657 | 2.294   |
| Importance of urban green spaces for mental health   | Borough        | Queens : Manhattan        | 0.616 | 0.411 | 0.926 * |
| Importance of urban green spaces for mental health   | Borough        | Brooklyn : Manhattan      | 1.018 | 0.75  | 1.378   |
| Importance of urban green spaces for mental health   | Borough        | Staten Island : Manhattan | 0.324 | 0.106 | 1.049   |
| Importance of urban green spaces for physical health | Gender         | Male : Female             | 0.623 | 0.475 | 0.817 * |
| Importance of urban green spaces for physical health | Gender         | Nonbinary : Female        | 1.029 | 0.42  | 2.694   |
| Importance of urban green spaces for physical health | Race/ethnicity | Asian : not Asian         | 0.538 | 0.31  | 0.936 * |
| Importance of urban green spaces for physical health | Race/ethnicity | Black : not Black         | 0.493 | 0.286 | 0.849 * |
| Importance of urban green spaces for physical health | Race/ethnicity | Latinx : not Latinx       | 1.198 | 0.778 | 1.874   |
| Importance of urban green spaces for physical health | Race/ethnicity | White : not White         | 1.146 | 0.717 | 1.82    |
| Importance of urban green spaces for physical health | Borough        | Bronx : Manhattan         | 1.018 | 0.58  | 1.824   |

|                                                      |         |                           |       |       |        |
|------------------------------------------------------|---------|---------------------------|-------|-------|--------|
| Importance of urban green spaces for physical health | Borough | Queens : Manhattan        | 0.513 | 0.351 | 0.75 * |
| Importance of urban green spaces for physical health | Borough | Brooklyn : Manhattan      | 0.776 | 0.588 | 1.021  |
| Importance of urban green spaces for physical health | Borough | Staten Island : Manhattan | 0.374 | 0.139 | 1.048  |

**Table 4.** Regression coefficients for logit regressions predicting the selection of individual features considered important for an urban green space experience and the proportion of those features provided by the most visited urban green space.

| Response                | Predictor      | Comparison                | LogRatio | P-value  |
|-------------------------|----------------|---------------------------|----------|----------|
| Places to walk / trails |                | (Intercept)               | 17.956   | 0 ***    |
| Places to walk / trails | Gender         | Male : Female             | 0.529    | 0.008 ** |
| Places to walk / trails | Gender         | Nonbinary : Female        | 1.446    | 0.724    |
| Places to walk / trails | Race/ethnicity | Asian : not Asian         | 0.631    | 0.325    |
| Places to walk / trails | Race/ethnicity | Black : not Black         | 0.751    | 0.551    |
| Places to walk / trails | Race/ethnicity | Latinx : not Latinx       | 0.572    | 0.101    |
| Places to walk / trails | Race/ethnicity | White : not White         | 1.281    | 0.542    |
| Places to walk / trails | Borough        | Bronx : Manhattan         | 0.916    | 0.874    |
| Places to walk / trails | Borough        | Queens : Manhattan        | 0.465    | 0.028 *  |
| Places to walk / trails | Borough        | Brooklyn : Manhattan      | 0.622    | 0.088    |
| Places to walk / trails | Borough        | Staten Island : Manhattan | 0.288    | 0.125    |
| Trees, shade            |                | (Intercept)               | 7.496    | 0 ***    |
| Trees, shade            | Gender         | Male : Female             | 0.714    | 0.16     |
| Trees, shade            | Gender         | Nonbinary : Female        | 0.613    | 0.469    |
| Trees, shade            | Race/ethnicity | Asian : not Asian         | 1.195    | 0.705    |
| Trees, shade            | Race/ethnicity | Black : not Black         | 0.648    | 0.302    |
| Trees, shade            | Race/ethnicity | Latinx : not Latinx       | 0.762    | 0.425    |
| Trees, shade            | Race/ethnicity | White : not White         | 1.862    | 0.094    |
| Trees, shade            | Borough        | Bronx : Manhattan         | 1.13     | 0.799    |
| Trees, shade            | Borough        | Queens : Manhattan        | 0.798    | 0.501    |
| Trees, shade            | Borough        | Brooklyn : Manhattan      | 1.017    | 0.946    |
| Trees, shade            | Borough        | Staten Island : Manhattan | 0.093    | 0 ***    |
| Places to sit           |                | (Intercept)               | 4.799    | 0 ***    |
| Places to sit           | Gender         | Male : Female             | 0.763    | 0.108    |
| Places to sit           | Gender         | Nonbinary : Female        | 1.1      | 0.871    |
| Places to sit           | Race/ethnicity | Asian : not Asian         | 0.997    | 0.994    |
| Places to sit           | Race/ethnicity | Black : not Black         | 0.793    | 0.512    |
| Places to sit           | Race/ethnicity | Latinx : not Latinx       | 1.89     | 0.037 *  |
| Places to sit           | Race/ethnicity | White : not White         | 0.873    | 0.657    |
| Places to sit           | Borough        | Bronx : Manhattan         | 0.465    | 0.021 *  |

|                                                                                |                |                           |       |          |
|--------------------------------------------------------------------------------|----------------|---------------------------|-------|----------|
| Places to sit                                                                  | Borough        | Queens : Manhattan        | 0.811 | 0.393    |
| Places to sit                                                                  | Borough        | Brooklyn : Manhattan      | 0.762 | 0.113    |
| Places to sit                                                                  | Borough        | Staten Island : Manhattan | 0.157 | 0.002 ** |
| Landscaping /<br>maintained gardens,<br>flowers, or lawn                       |                | (Intercept)               | 4.104 | 0 ***    |
| Landscaping /<br>maintained gardens,<br>flowers, or lawn                       | Gender         | Male : Female             | 0.795 | 0.129    |
| Landscaping /<br>maintained gardens,<br>flowers, or lawn                       | Gender         | Nonbinary : Female        | 0.497 | 0.151    |
| Landscaping /<br>maintained gardens,<br>flowers, or lawn                       | Race/ethnicity | Asian : not Asian         | 0.61  | 0.113    |
| Landscaping /<br>maintained gardens,<br>flowers, or lawn                       | Race/ethnicity | Black : not Black         | 0.763 | 0.389    |
| Landscaping /<br>maintained gardens,<br>flowers, or lawn                       | Race/ethnicity | Latinx : not Latinx       | 1.141 | 0.583    |
| Landscaping /<br>maintained gardens,<br>flowers, or lawn                       | Race/ethnicity | White : not White         | 0.633 | 0.085    |
| Landscaping /<br>maintained gardens,<br>flowers, or lawn                       | Borough        | Bronx : Manhattan         | 0.577 | 0.076    |
| Landscaping /<br>maintained gardens,<br>flowers, or lawn                       | Borough        | Queens : Manhattan        | 0.631 | 0.03 *   |
| Landscaping /<br>maintained gardens,<br>flowers, or lawn                       | Borough        | Brooklyn : Manhattan      | 0.643 | 0.003 ** |
| Landscaping /<br>maintained gardens,<br>flowers, or lawn                       | Borough        | Staten Island : Manhattan | 0.715 | 0.568    |
| Water feature (e.g. river,<br>lake, pond, ocean,<br>fountain, sprinkler, pool) |                | (Intercept)               | 2.176 | 0.004 ** |
| Water feature (e.g. river,<br>lake, pond, ocean,<br>fountain, sprinkler, pool) | Gender         | Male : Female             | 0.679 | 0.009 ** |

|                                                                          |                |                           |       |       |
|--------------------------------------------------------------------------|----------------|---------------------------|-------|-------|
| Water feature (e.g. river, lake, pond, ocean, fountain, sprinkler, pool) | Gender         | Nonbinary : Female        | 0.465 | 0.114 |
| Water feature (e.g. river, lake, pond, ocean, fountain, sprinkler, pool) | Race/ethnicity | Asian : not Asian         | 0.837 | 0.555 |
| Water feature (e.g. river, lake, pond, ocean, fountain, sprinkler, pool) | Race/ethnicity | Black : not Black         | 1.043 | 0.89  |
| Water feature (e.g. river, lake, pond, ocean, fountain, sprinkler, pool) | Race/ethnicity | Latinx : not Latinx       | 0.956 | 0.846 |
| Water feature (e.g. river, lake, pond, ocean, fountain, sprinkler, pool) | Race/ethnicity | White : not White         | 0.855 | 0.534 |
| Water feature (e.g. river, lake, pond, ocean, fountain, sprinkler, pool) | Borough        | Bronx : Manhattan         | 1.027 | 0.931 |
| Water feature (e.g. river, lake, pond, ocean, fountain, sprinkler, pool) | Borough        | Queens : Manhattan        | 0.809 | 0.303 |
| Water feature (e.g. river, lake, pond, ocean, fountain, sprinkler, pool) | Borough        | Brooklyn : Manhattan      | 0.801 | 0.123 |
| Water feature (e.g. river, lake, pond, ocean, fountain, sprinkler, pool) | Borough        | Staten Island : Manhattan | 1.436 | 0.558 |
| exercise, play sports                                                    | (Intercept)    |                           | 0.801 | 0.396 |
| exercise, play sports                                                    | Gender         | Male : Female             | 1.303 | 0.072 |
| exercise, play sports                                                    | Gender         | Nonbinary : Female        | 0.774 | 0.597 |
| exercise, play sports                                                    | Race/ethnicity | Asian : not Asian         | 0.936 | 0.824 |
| exercise, play sports                                                    | Race/ethnicity | Black : not Black         | 1.222 | 0.493 |
| exercise, play sports                                                    | Race/ethnicity | Latinx : not Latinx       | 0.947 | 0.808 |
| exercise, play sports                                                    | Race/ethnicity | White : not White         | 1.115 | 0.656 |
| exercise, play sports                                                    | Borough        | Bronx : Manhattan         | 1.217 | 0.51  |
| exercise, play sports                                                    | Borough        | Queens : Manhattan        | 0.857 | 0.445 |

|                                        |                |                           |       |         |
|----------------------------------------|----------------|---------------------------|-------|---------|
| Place for children to play             |                |                           |       |         |
| Place for children to play             | Borough        | Brooklyn : Manhattan      | 1.339 | 0.038 * |
| Place for children to play             | Borough        | Staten Island : Manhattan | 0.925 | 0.891   |
| Place for children to play             |                | (Intercept)               | 0.905 | 0.703   |
| Place for children to play             | Gender         | Male : Female             | 0.738 | 0.038 * |
| Place for children to play             | Gender         | Nonbinary : Female        | 0.757 | 0.564   |
| Place for children to play             | Race/ethnicity | Asian : not Asian         | 0.87  | 0.639   |
| Place for children to play             | Race/ethnicity | Black : not Black         | 0.901 | 0.722   |
| Place for children to play             | Race/ethnicity | Latinx : not Latinx       | 1.242 | 0.336   |
| Place for children to play             | Race/ethnicity | White : not White         | 1.192 | 0.472   |
| Place for children to play             | Borough        | Bronx : Manhattan         | 0.89  | 0.697   |
| Place for children to play             | Borough        | Queens : Manhattan        | 1.384 | 0.111   |
| Place for children to play             | Borough        | Brooklyn : Manhattan      | 1.076 | 0.603   |
| Place for children to play             | Borough        | Staten Island : Manhattan | 0.879 | 0.821   |
| Socializing, spending time with others |                | (Intercept)               | 0.879 | 0.624   |
| Socializing, spending time with others | Gender         | Male : Female             | 0.914 | 0.536   |
| Socializing, spending time with others | Gender         | Nonbinary : Female        | 2.117 | 0.143   |
| Socializing, spending time with others | Race/ethnicity | Asian : not Asian         | 0.996 | 0.991   |
| Socializing, spending time with others | Race/ethnicity | Black : not Black         | 0.894 | 0.703   |
| Socializing, spending time with others | Race/ethnicity | Latinx : not Latinx       | 0.858 | 0.497   |
| Socializing, spending time with others | Race/ethnicity | White : not White         | 1.178 | 0.505   |

|                                                                       |                |                           |       |         |
|-----------------------------------------------------------------------|----------------|---------------------------|-------|---------|
| Socializing, spending time with others                                | Borough        | Bronx : Manhattan         | 0.685 | 0.214   |
| Socializing, spending time with others                                | Borough        | Queens : Manhattan        | 0.957 | 0.826   |
| Socializing, spending time with others                                | Borough        | Brooklyn : Manhattan      | 1.162 | 0.285   |
| Socializing, spending time with others                                | Borough        | Staten Island : Manhattan | 0.411 | 0.149   |
| Educational opportunities (e.g. informational signage, guided trails) |                | (Intercept)               | 0.732 | 0.246   |
| Educational opportunities (e.g. informational signage, guided trails) | Gender         | Male : Female             | 0.706 | 0.03 *  |
| Educational opportunities (e.g. informational signage, guided trails) | Gender         | Nonbinary : Female        | 1.734 | 0.258   |
| Educational opportunities (e.g. informational signage, guided trails) | Race/ethnicity | Asian : not Asian         | 1.251 | 0.457   |
| Educational opportunities (e.g. informational signage, guided trails) | Race/ethnicity | Black : not Black         | 0.704 | 0.252   |
| Educational opportunities (e.g. informational signage, guided trails) | Race/ethnicity | Latinx : not Latinx       | 1.44  | 0.112   |
| Educational opportunities (e.g. informational signage, guided trails) | Race/ethnicity | White : not White         | 0.678 | 0.121   |
| Educational opportunities (e.g. informational signage, guided trails) | Borough        | Bronx : Manhattan         | 1.849 | 0.043 * |
| Educational opportunities (e.g. informational signage, guided trails) | Borough        | Queens : Manhattan        | 0.943 | 0.784   |

|                                                                       |                |                           |       |          |
|-----------------------------------------------------------------------|----------------|---------------------------|-------|----------|
| Educational opportunities (e.g. informational signage, guided trails) | Borough        | Brooklyn : Manhattan      | 0.991 | 0.953    |
| Educational opportunities (e.g. informational signage, guided trails) | Borough        | Staten Island : Manhattan | 0.905 | 0.872    |
| Opportunities to view wildlife                                        |                | (Intercept)               | 0.331 | 0.001 ** |
| Opportunities to view wildlife                                        | Gender         | Male : Female             | 0.946 | 0.757    |
| Opportunities to view wildlife                                        | Gender         | Nonbinary : Female        | 1.511 | 0.453    |
| Opportunities to view wildlife                                        | Race/ethnicity | Asian : not Asian         | 0.707 | 0.371    |
| Opportunities to view wildlife                                        | Race/ethnicity | Black : not Black         | 0.243 | 0.003 ** |
| Opportunities to view wildlife                                        | Race/ethnicity | Latinx : not Latinx       | 0.706 | 0.259    |
| Opportunities to view wildlife                                        | Race/ethnicity | White : not White         | 1.045 | 0.891    |
| Opportunities to view wildlife                                        | Borough        | Bronx : Manhattan         | 1.624 | 0.177    |
| Opportunities to view wildlife                                        | Borough        | Queens : Manhattan        | 0.899 | 0.667    |
| Opportunities to view wildlife                                        | Borough        | Brooklyn : Manhattan      | 0.825 | 0.261    |
| Opportunities to view wildlife                                        | Borough        | Staten Island : Manhattan | 1.817 | 0.31     |
| Places to BBQ, cook food                                              |                | (Intercept)               | 0.185 | 0 ***    |
| Places to BBQ, cook food                                              | Gender         | Male : Female             | 1.243 | 0.23     |
| Places to BBQ, cook food                                              | Gender         | Nonbinary : Female        | 4.241 | 0.003 ** |
| Places to BBQ, cook food                                              | Race/ethnicity | Asian : not Asian         | 0.77  | 0.494    |
| Places to BBQ, cook food                                              | Race/ethnicity | Black : not Black         | 1.548 | 0.192    |
| Places to BBQ, cook food                                              | Race/ethnicity | Latinx : not Latinx       | 1.823 | 0.017 *  |
| Places to BBQ, cook food                                              | Race/ethnicity | White : not White         | 0.906 | 0.736    |
| Places to BBQ, cook food                                              | Borough        | Bronx : Manhattan         | 1.268 | 0.5      |
| Places to BBQ, cook food                                              | Borough        | Queens : Manhattan        | 0.989 | 0.968    |



|                                                                             |                |                           |       |         |
|-----------------------------------------------------------------------------|----------------|---------------------------|-------|---------|
| Places to BBQ, cook food                                                    | Borough        | Brooklyn : Manhattan      | 1.411 | 0.059   |
| Places to BBQ, cook food                                                    | Borough        | Staten Island : Manhattan | 0.889 | 0.883   |
| Dog-friendly                                                                |                | (Intercept)               | 0.126 | 0 ***   |
| Dog-friendly                                                                | Gender         | Male : Female             | 0.799 | 0.301   |
| Dog-friendly                                                                | Gender         | Nonbinary : Female        | 2.868 | 0.042 * |
| Dog-friendly                                                                | Race/ethnicity | Asian : not Asian         | 1.515 | 0.3     |
| Dog-friendly                                                                | Race/ethnicity | Black : not Black         | 0.991 | 0.983   |
| Dog-friendly                                                                | Race/ethnicity | Latinx : not Latinx       | 1.079 | 0.809   |
| Dog-friendly                                                                | Race/ethnicity | White : not White         | 1.424 | 0.308   |
| Dog-friendly                                                                | Borough        | Bronx : Manhattan         | 1.846 | 0.101   |
| Dog-friendly                                                                | Borough        | Queens : Manhattan        | 0.56  | 0.087   |
| Dog-friendly                                                                | Borough        | Brooklyn : Manhattan      | 1.056 | 0.781   |
| Dog-friendly                                                                | Borough        | Staten Island : Manhattan | 0.92  | 0.917   |
| Proportion of important features provided by most visited urban green space |                | (Intercept)               | 3.523 | 0 ***   |
| Proportion of important features provided by most visited urban green space | Gender         | Male : Female             | 1.151 | 0.482   |
| Proportion of important features provided by most visited urban green space | Gender         | Nonbinary : Female        | 1.124 | 0.857   |
| Proportion of important features provided by most visited urban green space | Race/ethnicity | Asian : not Asian         | 1.315 | 0.48    |
| Proportion of important features provided by most visited urban green space | Race/ethnicity | Black : not Black         | 0.96  | 0.91    |
| Proportion of important features provided by most visited urban green space | Race/ethnicity | Latinx : not Latinx       | 0.962 | 0.891   |
| Proportion of important features provided by most visited urban green space | Race/ethnicity | White : not White         | 1.569 | 0.138   |
| Proportion of important features provided by most visited urban green space | Borough        | Bronx : Manhattan         | 0.723 | 0.373   |

|                                                                             |         |                           |       |         |
|-----------------------------------------------------------------------------|---------|---------------------------|-------|---------|
| Proportion of important features provided by most visited urban green space | Borough | Queens : Manhattan        | 0.604 | 0.043 * |
| Proportion of important features provided by most visited urban green space | Borough | Brooklyn : Manhattan      | 1.038 | 0.849   |
| Proportion of important features provided by most visited urban green space | Borough | Staten Island : Manhattan | 0.778 | 0.735   |
